# Supplementary material for: Cocrystal Prediction of Bexarotene by Graph Convolution Network and Bioavailability Improvement
Source: MDPI journal article supplement (doi:10.3390/pharmaceutics14102198), 2022-10-16
Supplement: s1 [file s1]

# Cocrystal Prediction of Bexarotene by Graph Convolution Network and Bioavailability Improvement

## Supporting Information

Fu Xiao <sup>1,2,†</sup>, Yinxiang Cheng <sup>1,3,†</sup>, Jian-Rong Wang <sup>1</sup>, Dingyan Wang <sup>1,3</sup>, Yuanyuan Zhang <sup>1,3</sup>,  
Kaixian Chen <sup>1,2,3</sup>,  
Xuefeng Mei <sup>1,3,\*</sup> and Xiaomin Luo <sup>1,2,3,\*</sup>

<sup>1</sup> State Key Laboratory of Drug Research and Drug Discovery and Design Center, Pharmaceutical Analytical & Solid-State Chemistry Research Center, Shanghai Institute of Materia Medica, Chinese Academy of Sciences, Shanghai 201203, China

<sup>2</sup> School of Chinese Materia Medica, Nanjing University of Chinese Medicine, Nanjing 210023, China

<sup>3</sup> University of Chinese Academy of Sciences, Beijing 100049, China

\* Correspondence: xuefengmei@sim.ac.cn (X.M.); xmluo@sim.ac.cn (X.L.)

† These authors contributed equally to this work.

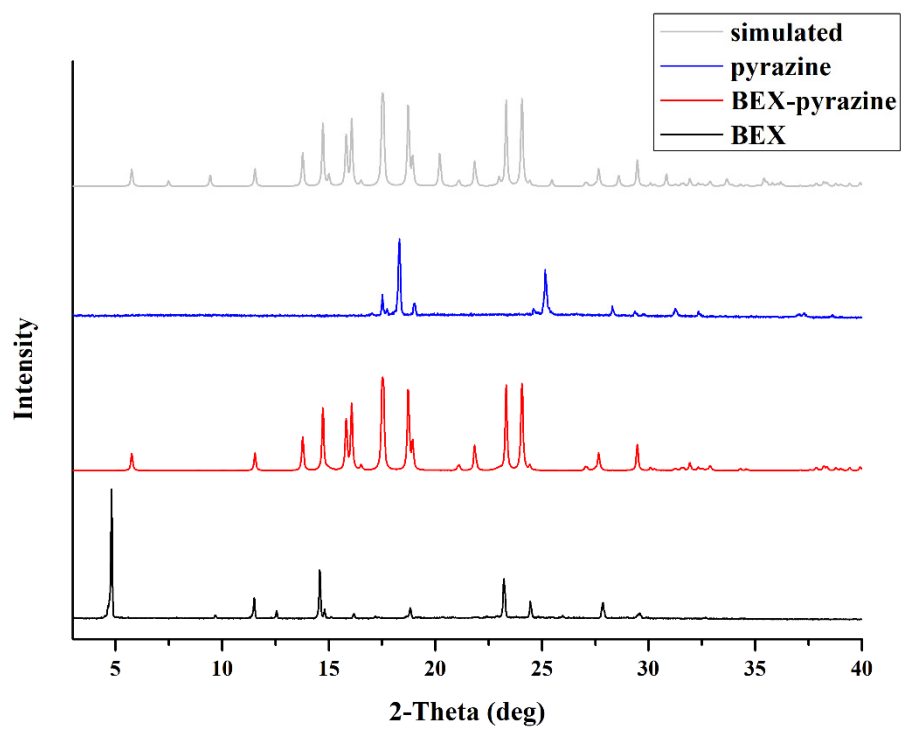

(a)

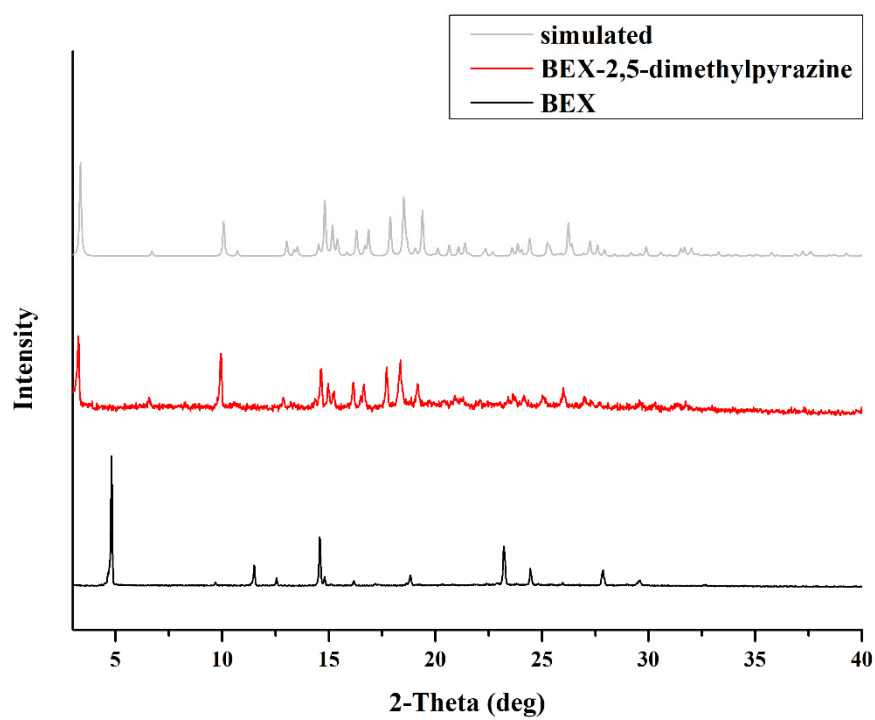

(b)

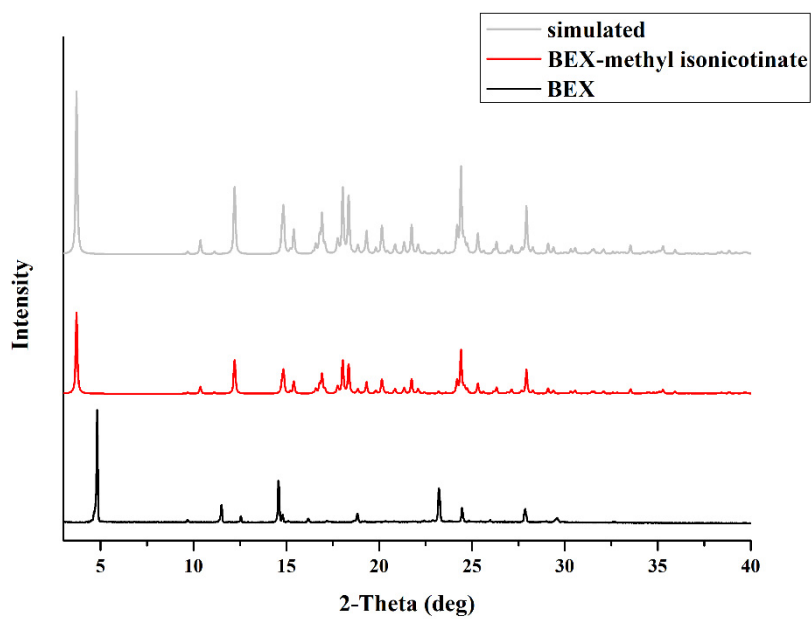

(c)

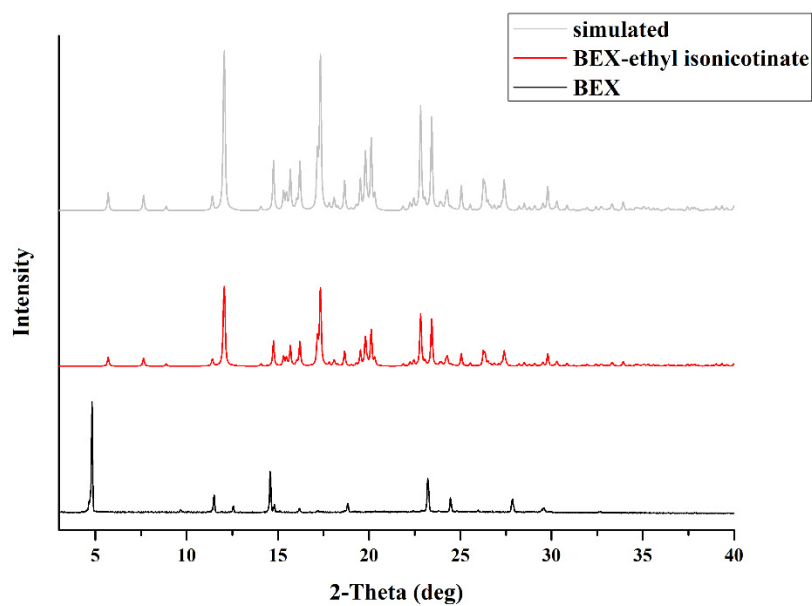

(d)

Figure S1. PXRD patterns of solid forms of BEX: (a) BEX-pyrazine, (b) BEX-2,5-dimethylpyrazine, (c) BEX- methyl isonicotinate, (d) BEX- ethyl isonicotinate.

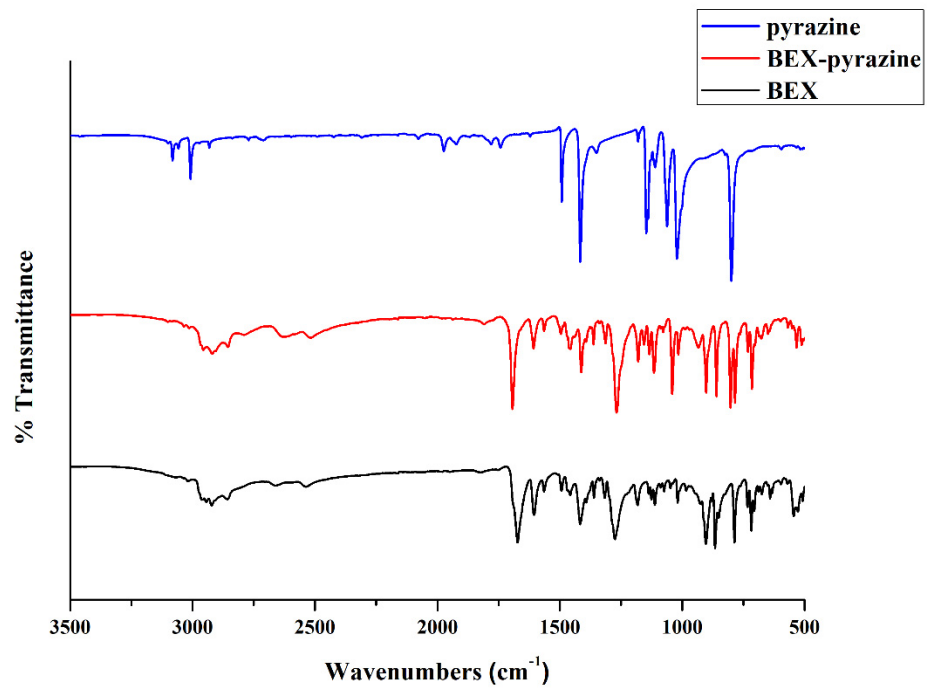

(a)

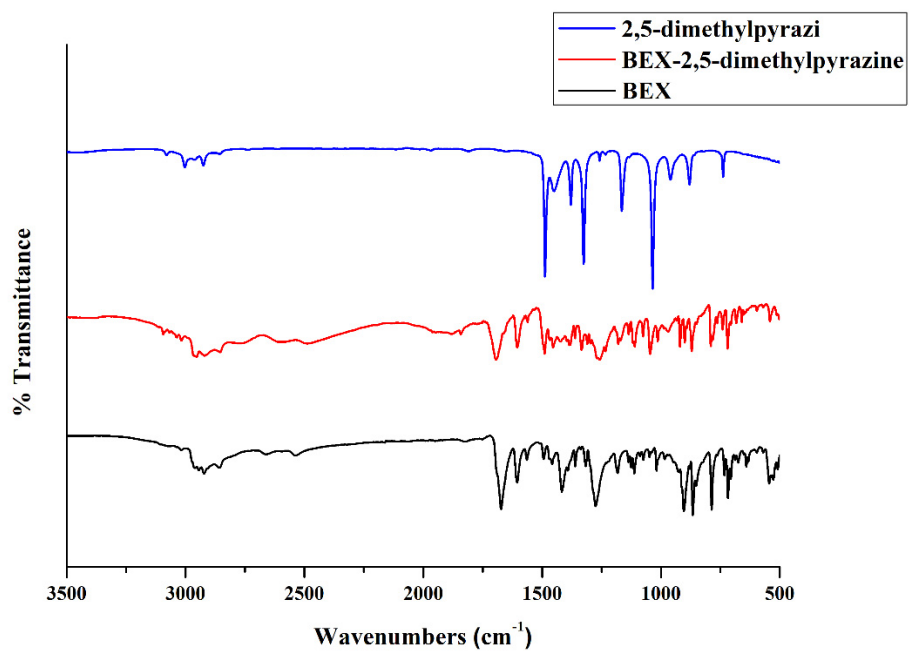

(b)

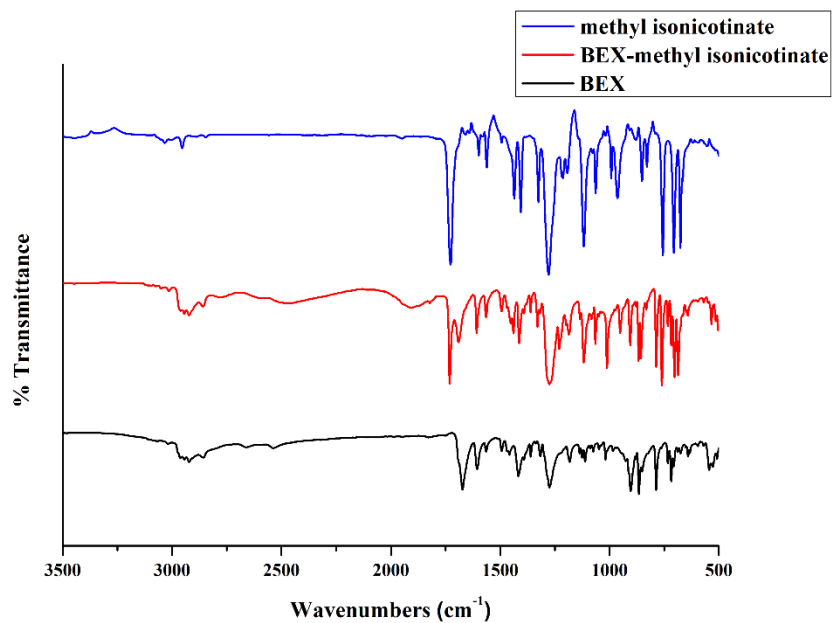

(c)

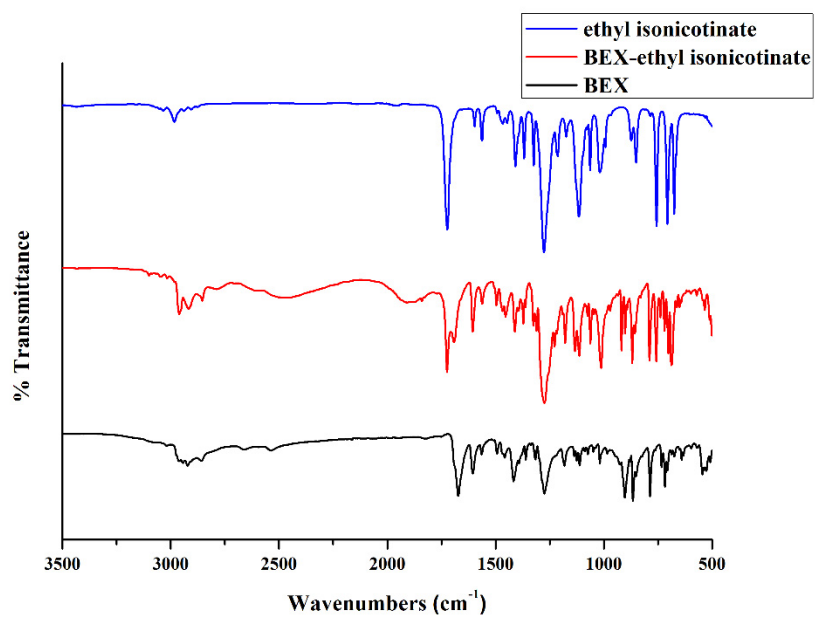

(d)

Figure S2. FTIR spectra of (a) BEX-pyrazine, (b) BEX-2,5-dimethylpyrazine, (c) BEX-methyl isonicotinate, (d) BEX-ethyl isonicotinate.

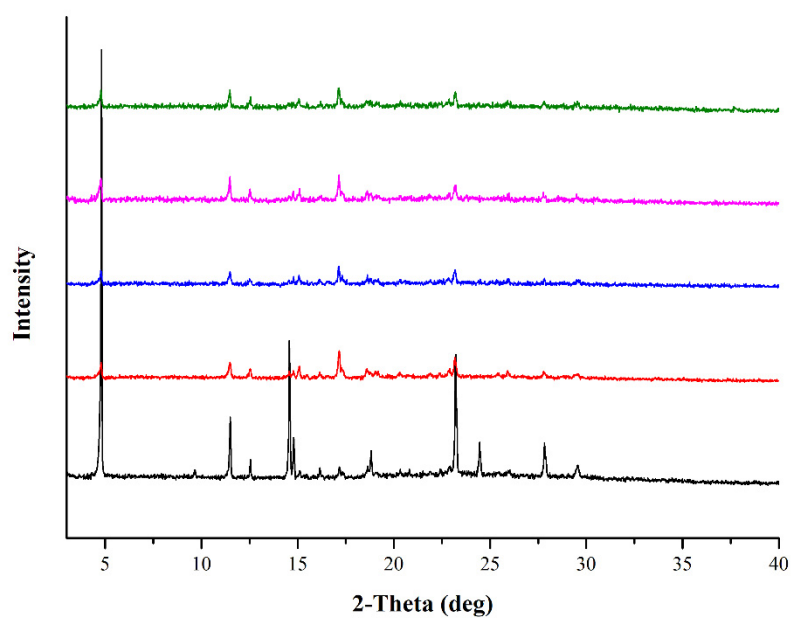

(a)

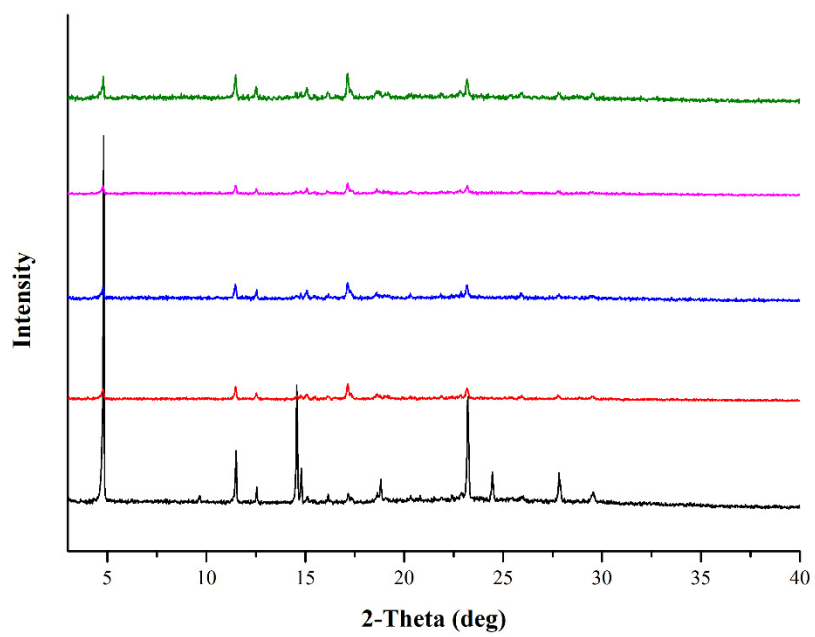

(b)

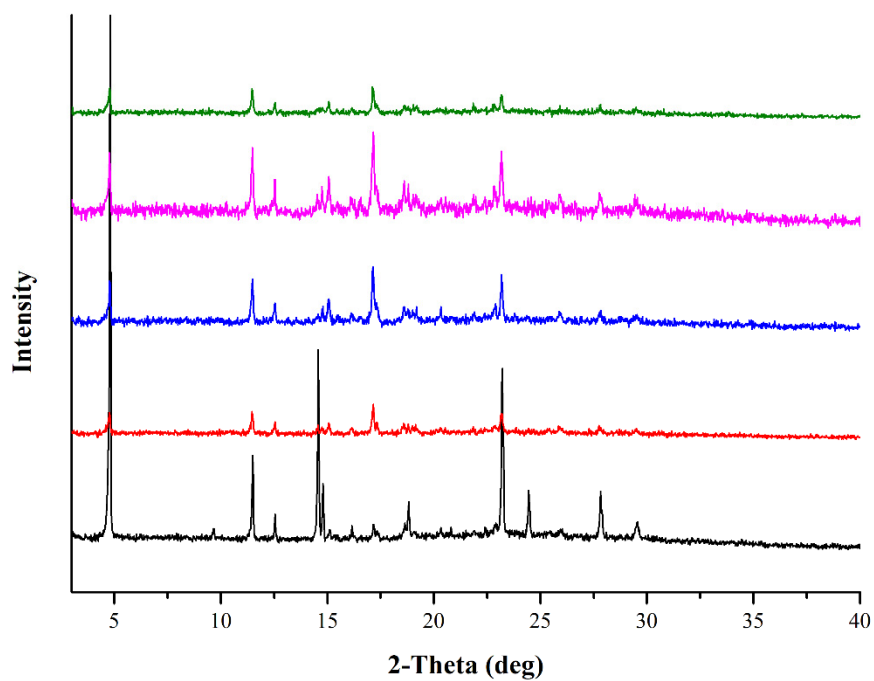

(c)

Figure S3. XRPD patterns of residues after equilibrium solubility studies. (a) pH 2.0 (b) pH 4.5 (c) pH 6.8. The XRPD pattern from top to bottom in each figure is BEX-pyrazine, BEX-2,5-dimethylpyrazine, BEX- methyl isonicotinate, BEX- ethyl isonicotinate and BEX raw materials respectively.

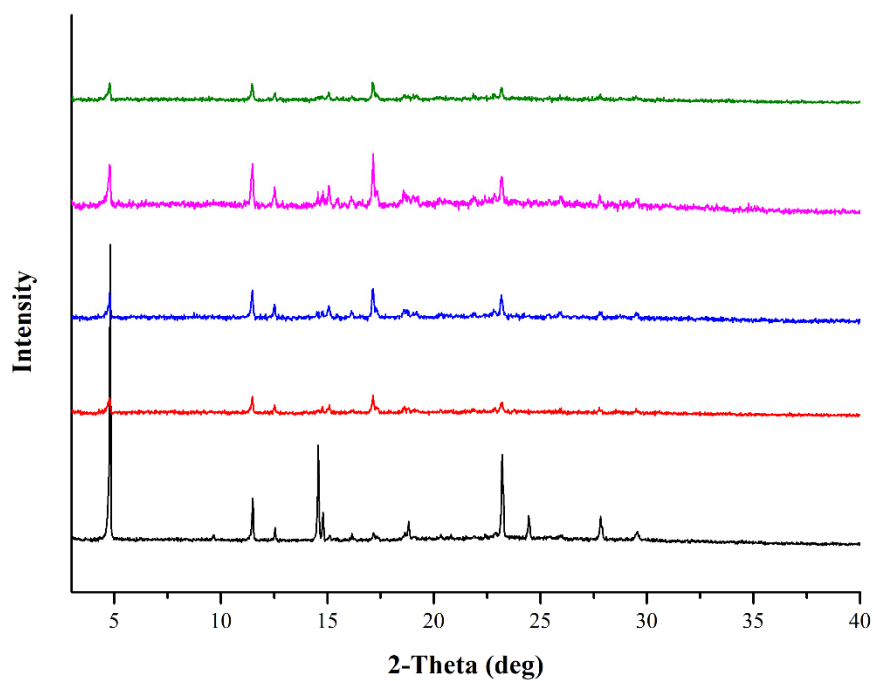

Figure S4. XRPD patterns of residues after powder dissolution. The XRPD pattern from top to bottom is BEX-pyrazine, BEX-2,5-dimethylpyrazine, BEX- methyl isonicotinate, BEX- ethyl isonicotinate and BEX raw materials respectively.



**Table S1.** Atom features used in CocystalGCN.

| Feature          | Size | Description                                                                                            |
|------------------|------|--------------------------------------------------------------------------------------------------------|
| Atom type        | 9    | type of atom (ex. C, N, O, P, S, F) (one-hot)                                                          |
| Hybridization    | 5    | sp, sp <sup>2</sup> , sp <sup>3</sup> , sp <sup>3</sup> d, or sp <sup>3</sup> d <sup>2</sup> (one-hot) |
| Degree           | 7    | the number of heavy atom neighbors (one-hot)                                                           |
| Formal charge    | 7    | atomic formal charge (-3 to +3, one-hot)                                                               |
| Implicit valence | 7    | the number of implicit hydrogens (0 to 6, one-hot)                                                     |
| Hydrogens        | 5    | the number of neighboring hydrogens (0 to 4, one-hot)                                                  |
| Atomic number    | 1    | Atomic number (integer)                                                                                |
| Ring size        | 6    | whether this atom belongs to a ring (3 to 8, binary)                                                   |
| Acid/base        | 2    | whether this atom is acidic or basic (binary)                                                          |
| Hydrogen bonding | 2    | whether this atom is a hydrogen bond donor or acceptor (binary)                                        |
| Aromaticity      | 1    | whether this atom is part of an aromatic system (binary)                                               |

**Table S2.** The search spaces of hyperparameters for CocystalGCN.

|                                 | <b>Hyperparameter</b>            | <b>Search spaces</b>      |
|---------------------------------|----------------------------------|---------------------------|
| Training                        | Epoch                            | 1000                      |
|                                 | Batch size                       | 32, 64, 128               |
|                                 | Patience                         | 200, 400                  |
|                                 | Initial learning rate            | 0.00015                   |
|                                 | Loss                             | Binary cross-entropy      |
|                                 | Optimizer                        | SGD, Adam                 |
| Node Embedding                  | Number of embedding layers       | 1, 2                      |
|                                 | Size of output units             | 128, 256, 512             |
| Graph Convolution (Covalent)    | Number of convolution layers     | 1, 2, 3                   |
|                                 | Size of output units             | 128, 256, 512             |
| Graph Convolution (Noncovalent) | Number of convolution layers     | 1, 2, 3                   |
|                                 | Size of output units             | 128, 256, 512             |
| Graph pooling                   | Pooling type                     | Sum, Max, Average         |
| Fully connected                 | Number of fully connected layers | 2, 3                      |
|                                 | Size of output units             | 128, 256, 512             |
|                                 | Dropout                          | 0.4, 0.5, 0.6             |
|                                 | l2 regularization                | 0, 0.00125, 0.0025, 0.005 |

**Table S3.** The search spaces of hyperparameters for baseline models.

| Models  | Hyperparameter     | Search spaces                  |
|---------|--------------------|--------------------------------|
| RF      | n_estimators       | 300, 600, 800                  |
|         | max_depth          | 11, 21, 25, None               |
|         | max_features       | auto, sqrt, log2               |
|         | criterion          | gini, entropy                  |
| SVM     | C                  | 1e-3, 0.01, 0.1, 10, 100       |
|         | kernel             | linear, rbf, sigmoid, poly     |
|         | gamma              | 0.01, 0.5, 1, auto             |
| XGBoost | learning_rate      | 0.001, 0.01, 0.1, 1            |
|         | lambda             | 0, 1, 5                        |
|         | max_depth          | 10, 100, 500                   |
|         | n_estimators       | 500, 1000                      |
| DNN     | solver             | lbfgs, adam                    |
|         | activation         | tanh, relu, logistic, identity |
|         | max_iter           | 300, 400, 600, 800             |
|         | hidden_layer_sizes | 100, 50, 10                    |
|         | learning_rate_init | 0.01, 0.05, 0.1, 0.3           |
| DeepDDS | epoch              | 300, 500                       |
|         | batch_size         | 64, 128, 256                   |
|         | learning_rate      | 0.00025, 0.0005                |
|         | dropout            | 0.2, 0.5                       |
|         | output_dim         | 128, 256                       |
|         | convolution layers | 1, 2, 3                        |

**Table S4.** Crystallographic Data of BEX cocrystals.

|                                       | BEX-<br>pyrazine                                | BEX-2,5-<br>dimethylpyrazine                                  | BEX-methyl<br>isonicotinate                     | BEX- ethyl<br>isonicotinate                     |
|---------------------------------------|-------------------------------------------------|---------------------------------------------------------------|-------------------------------------------------|-------------------------------------------------|
| Formula                               | C <sub>26</sub> H <sub>30</sub> NO <sub>2</sub> | C <sub>30</sub> H <sub>36</sub> N <sub>2</sub> O <sub>2</sub> | C <sub>31</sub> H <sub>35</sub> NO <sub>4</sub> | C <sub>32</sub> H <sub>37</sub> NO <sub>4</sub> |
| Crystal system                        | triclinic                                       | monoclinic                                                    | triclinic                                       | triclinic                                       |
| Space group                           | <i>P</i> -1                                     | <i>C</i> 2/ <i>c</i>                                          | <i>P</i> -1                                     | <i>P</i> -1                                     |
| Temperature(K)                        | 100                                             | 170                                                           | 170                                             | 170                                             |
| <i>a</i> (Å)                          | 6.0104(17)                                      | 53.4719(18)                                                   | 6.0219(5)                                       | 6.0211(7)                                       |
| <i>b</i> (Å)                          | 11.797(3)                                       | 8.3448(2)                                                     | 9.2064(7)                                       | 14.894(2)                                       |
| <i>c</i> (Å)                          | 15.320(4)                                       | 11.6779(3)                                                    | 23.840(2)                                       | 15.719(2)                                       |
| $\alpha$ (deg)                        | 90.14(5)                                        | 90                                                            | 89.939(3)                                       | 81.181(4)                                       |
| $\beta$ (deg)                         | 90.16(3)                                        | 100.189(2)                                                    | 88.505(3)                                       | 85.725(4)                                       |
| $\gamma$ (deg)                        | 90.20(6)                                        | 90                                                            | 82.017(3)                                       | 86.697(4)                                       |
| V (Å <sup>3</sup> )                   | 1086.3(5)                                       | 5128.6(3)                                                     | 1308.45(18)                                     | 1387.6(3)                                       |
| D <sub>Cal</sub> (g/cm <sup>3</sup> ) | 1.188                                           | 1.183                                                         | 1.233                                           | 1.196                                           |
| Z                                     | 2                                               | 8                                                             | 2                                               | 2                                               |
| $\lambda$ (Mo K $\alpha$ )            | 0.71073                                         | 0.71073                                                       | 0.71073                                         | 0.71073                                         |
| Independent<br>reflns.                | 4430                                            | 5255                                                          | 5334                                            | 5653                                            |
| S                                     | 1.018                                           | 1.063                                                         | 1.036                                           | 1.015                                           |
| R <sub>int</sub>                      | 0.0944                                          | 0.0616                                                        | 0.0527                                          | 0.0541                                          |
| R <sub>1</sub>                        | 0.0789                                          | 0.0496                                                        | 0.0580                                          | 0.0759                                          |
| wR <sub>2</sub>                       | 0.1982                                          | 0.1669                                                        | 0.1602                                          | 0.2113                                          |

**Table S5.** The pH values of Bex and cocrystal solutions after equilibrium solubility experiments (n = 3).

| Form                     | pH values   |             |             |
|--------------------------|-------------|-------------|-------------|
|                          | 2.00        | 4.50        | 6.80        |
| BEX                      | 2.06 ± 0.01 | 4.58 ± 0.01 | 6.82 ± 0.02 |
| BEX-pyrazine             | 2.04 ± 0.02 | 4.60 ± 0.01 | 6.82 ± 0.01 |
| BEX-2,5-dimethylpyrazine | 2.07 ± 0.01 | 4.61 ± 0.01 | 6.89 ± 0.01 |
| BEX-methyl isonicotinate | 2.10 ± 0.01 | 4.63 ± 0.02 | 6.87 ± 0.01 |
| BEX-ethyl isonicotinate  | 2.14 ± 0.02 | 4.61 ± 0.01 | 6.85 ± 0.03 |

**Table S6.** The pH values of Bex and cocrystal solutions after powder dissolution at pH 6.8 (n = 3).

| Form                     | pH values   |
|--------------------------|-------------|
| BEX                      | 6.81 ± 0.01 |
| BEX-pyrazine             | 6.82 ± 0.01 |
| BEX-2,5-dimethylpyrazine | 6.86 ± 0.02 |
| BEX-methyl isonicotinate | 6.84 ± 0.01 |
| BEX-ethyl isonicotinate  | 6.86 ± 0.01 |
